# Supplementary material for: Combinational benefit of antihistamines and remdesivir for reducing SARS-CoV-2 replication and alleviating inflammation-induced lung injury in mice
Source: PubMed Central journal article supplement — Zool Res. 2022 May 18;43(3):457–68. doi: 10.24272/j.issn.2095-8137.2021.469 (PMC9113965; doi:10.24272/j.issn.2095-8137.2021.469), 2022-05-18
Supplement: zr-43-3-457-S1.pdf [file zr-43-3-457-S1.pdf]

## Supplementary Materials

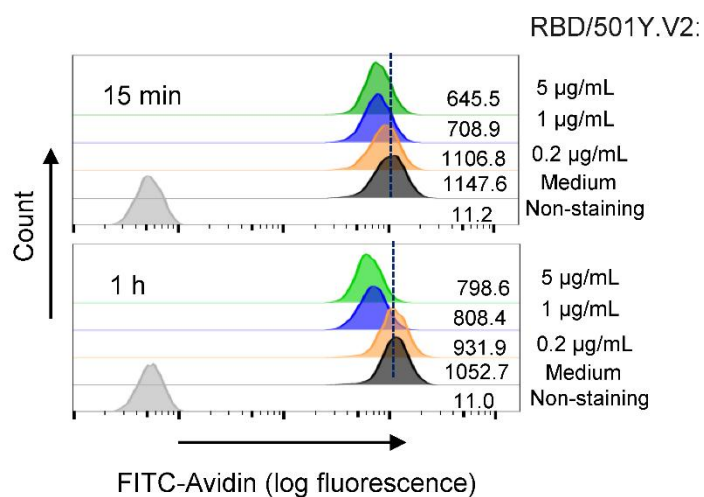

**Supplementary Figure S1. Spike/RBD of SARS-CoV-2 501Y.V2 strain stimulates MC degranulation.** LAD2 cells ( $3 \times 10^5$ ) were incubated with indicated concentrations of SARS-CoV-2 501Y.V2 strain-derived spike/RBD proteins at 37 °C for indicated time. Cells were fixed with 4% paraformaldehyde, permeabilized, immunostained with anti-avidin-FITC at 4 °C for 1 h, and analyzed with flow cytometry. MFI value was calculated. Representative result is from three independent repeats.

**Supplementary Table S1. Primers and probes for RT-PCR.**

|                                     |              |                                            |
|-------------------------------------|--------------|--------------------------------------------|
| <b>Human IL-6</b>                   | Forward      | 5'-CAG ACA GCC ACT CAC CTC TTC AG-3'       |
|                                     | Reverse      | 5'-CAG CCA TCT TTG GAA GGT TCA G-3'        |
| <b>Human CCL7</b>                   | Forward      | 5'-GAAGGACCAACCAGTAGCCAC-3'                |
|                                     | Reverse      | 5'-GTCCTGGACCCACTTCTGTG-3'                 |
| <b>Human CXCL10</b>                 | Forward      | 5'-GTGGCATTCAAGGAGTACCTC-3'                |
|                                     | Reverse      | 5'-TGATGGCCTTCGATTCTGGATT-3'               |
| <b>Human CXCL11</b>                 | Forward      | 5'-GACGCTGTCTTTGCATAGGC-3'                 |
|                                     | Reverse      | 5'-GGATTTAGGCATCGTTGTCCTTT-3'              |
| <b>Human ICAM1</b>                  | Forward      | 5'-AGCCAACCAATGTGCTATTCAAAC-3'             |
|                                     | Reverse      | 5'-CACCTGGCAGCGTAGGGTAA-3'                 |
| <b>Human S100A</b>                  | Forward      | 5'-GCAGCTGGAACGCAACATAG-3'                 |
|                                     | Reverse      | 5'-GTCACCCTCGTGCATCTTCT-3'                 |
| <b>Human GAPDH</b>                  | Forward      | 5'-ATC CCA TCA CCA TCT TCC AGG-3'          |
|                                     | Reverse      | 5'-CCT TCT CCA TGG TGG TGA AGA C-3'        |
| <b>Mouse IL-6</b>                   | Forward      | 5'-CTT CCA TCC AGT TGC CTT CTT G-3'        |
|                                     | Reverse      | 5'-AAT TAA GCC TCC GAC TTG TGA AG-3'       |
| <b>Mouse CXCL11</b>                 | Forward      | 5'-GGCTTCCTTATGTTCAAACAGGG-3'              |
|                                     | Reverse      | 5'-GCCGTTACTCGGGTAAATTACA-3'               |
| <b>Mouse ICAM1</b>                  | Forward      | 5'-GTGATGCTCAGGTATCCATCCA-3'               |
|                                     | Reverse      | 5'-CACAGTTCTCAAAGCACAGCG-3'                |
| <b>Mouse TNF<math>\alpha</math></b> | Forward      | 5'-CAG ACC CTC ACA CTC AGA TCA TCT-3'      |
|                                     | Reverse      | 5'- CCT CCA CTT GGT GGT TTG CTA-3'         |
| <b>Mouse CCL20</b>                  | Forward      | 5'-AAGACAGATGGCCGATGAAG-3'                 |
|                                     | Reverse      | 5'-AGGTTACAGCCCTTTTCAC-3'                  |
| <b>Mouse CCL5</b>                   | Forward      | 5'-GTGCCACGTCAAGGAGTAT-3'                  |
|                                     | Reverse      | 5'-GGGAAGCTATACAGGGTCA-3'                  |
| <b>Mouse GAPDH</b>                  | Forward      | 5'- TGC ACC ACC AAC TGC TTA G-3'           |
|                                     | Reverse      | 5'- GAT GCA GGG ATG ATG TTC-3'             |
| <b>SARS-CoV-2 nucleocapsid</b>      | Forward      | 5'-GGG GAA CTT CTC CTG CTA GAA T-3'        |
|                                     | Reverse      | 5'-CAG ACA TTT TGC TCT CAA GCT G-3'        |
|                                     | TaqMan probe | 5'-FAM-TTG CTG CTG CTT GAC AGA TT-TAMRA-3' |
